# Supplementary material
Source: publisher figshare collection journal article supplement (https://karger.figshare.com/ndownloader/files/35081686)
Supplement: Supplementary file 1 [file 35081686]

### Supplementary Table 1. Working Group members

| Country | Specialty | Name | Organization |
| --- | --- | --- | --- |
| Australia | Neonatology | Jeanie Cheong | Murdoch Children’s Research Institute |
| Australia | Patient representative | Kylie Pussel | Miracle Babies Foundation |
| Brazil | Epidemiology | Alicia Matijasevich | Departamento de Medicina Preventiva, Faculdade de Medicina, Universidade de São Paulo |
| Canada | Neonatal nursing | Linda Johnston | University of Toronto |
| France | Epidemiology | Jennifer Zeitlin | Institut national de la santé et de la recherche médicale (INSERM) |
| Germany | Patient representative | Silke Mader | European Foundation for the Care of Newborn Infants (EFCNI) |
| Ghana | Patient representative | Selina Bentoom | African foundation for premature babies and neonatal care |
| Ghana | Public Health | Kojo Yeboah-Antwi | Father Thomas Alan Rooney Memorial Hospital |
| Greece | Patient representative | Eleni Vavouraki | Ilitominon |
| India | Neonatology | Arti Maria | Atal Bihari Vajpayee Institute of Medical Sciences (ABVIMS), Dr. Ram Manohar Lohia Hospital, New Delhi |
| Mexico | Patient representative | Ilein Bolaños González | Con Amor Vencerás |
| Mexico | Opthalmology | Naira Pereyra | Hospital Star Médica Infantil |
| The Netherlands | Perinatology | Jasper Been | Erasmus University MC – Sophia Children’s Hospital |
| Ireland | Patient representative | Mandy Daly | Irish Neonatal Health Alliance |
| Singapore | Perinatology | Rashmi Mittal | KK Women’s and Children’s Hospital |
| United Kingdom | Neonatology | James Webbe | Imperial College London |
| United Kingdom | Psychology | Dieter Wolke | University of Warwick |
| United States | Neonatology | Haresh Kirpalani | Children’s Hospital of Philadelphia |
| United States | Pediatrics | Josef Neu | University of Florida |
